# Supplementary material for: Rapid Iodine Oxoacids Nucleation Enhanced by Dimethylamine in Broad Marine Regions
Source: Copernicus journal article supplement (doi:10.5194/egusphere-2023-1774), 2023-10-17
Supplement: Supplementary file [file egusphere-2023-1774-AC2-supplement.pdf]

Dear Editor,

Thank you very much for your handling our manuscript “**Rapid Iodine Oxoacids Nucleation Enhanced by Dimethylamine in Broad Marine Regions**” (Ms No.: egosphere-2023-1774). These comments are all valuable and very helpful for revising and improving our paper. We have revised the manuscript carefully according to the reviewers’ comments and the point-to-point responses are summarized below:

**Reviewer #2:**

The paper investigates the nucleation mechanism involving iodine oxoacids and dimethylamine (DMA). The authors suggest that DMA can enhance iodine oxoacid nucleation in ambient conditions and compare their results with ambient measurements. The mechanism explored by the authors is new; therefore, it may be worthy of publication in ACP. However, the authors fail to support their statement that their mechanism is important in broad marine regions. None of the three field observations supports their statements. In fact, two out of three observations strongly oppose the idea that HIO<sub>3</sub>-HIO<sub>2</sub>-DMA is an important mechanism, while the last one shows great ambiguity. A major revision is clearly needed. The authors should revise their manuscript so that ambient observations are correctly interpreted, and the implications of their results should be constrained properly before this manuscript can be accepted.

**Response:** We sincerely thank for the reviewer’s careful review of our manuscript. The detailed responses are listed as follows.

-----

**Major Comment 1.** While the subject is of great interest considering recent ambient and laboratory studies of iodine nucleation, I am not convinced by the authors that DMA is essential for pristine marine aerosol nucleation processes. The authors mention two field measurements from Ireland and Antarctica sites. However, my brief glance over these studies suggests that the evidence from these sites is clearly against their hypothesis, i.e., DMA is not important in the nucleation events observed there. In the Mace Head case (Sipila 2016), nucleation from iodine species was proposed by the authors to be the dominant mechanism there, and other nucleating species, e.g., SA, A, DMA, played a minor role there. In fact, the APi-TOF data did not even show the presence of A and DMA. Therefore, the authors’ conclusion that iodine nucleation could not explain the observation is more likely a problem with the authors’ calculations. Additionally, the authors’ way of saying HIO<sub>3</sub>-HIO<sub>2</sub> is not sufficient to explain the nucleation in Mace Head is rather flawed. The authors use an example case from Figure 1 of Sipila 2016. They adopted the corresponding nucleation rate as the bottom line of their range in Figure 5A. They further introduced an independent study (O’Dowd 2002) which reported an extraordinary  $1e6 \text{ cm}^{-3} \text{ s}^{-1}$  nucleation rate as the upper limit in Figure 5A. However, it is rather clear from Sipila 2016, Figure 3, that the example case represented the upper limit of the field observation. Therefore, the nucleation rate range is much lower than what the authors presented in their Figure 5A. In conclusion, their conclusion that HIO<sub>3</sub>-HIO<sub>2</sub>-DMA is important in the Mace Head station is not reasonable. In the Aboa station, the authors (Jokinen 2018) also clearly suggested that the nucleation mechanism there was dominated by the SA-A mechanism instead of iodine-dominated mechanisms. The authors measured little to no DMA-containing clusters in the APi-TOF, and therefore, HIO<sub>3</sub>-HIO<sub>2</sub>-DMA is not an important mechanism there.

The authors propose that the reason why DMA was not measured in Mace Head and Aboa was that

the Nitrate-CIMS in these campaigns was not sensitive enough to measure DMA. However, they ignored the fact that the API-TOF instrument was used in these campaigns and is extremely sensitive to DMA. The low (or no) DMA signals measured in these campaigns simply suggest that DMA was not important there, and the title and content of this paper exaggerate the implication of this manuscript. The proposed mechanism, at maximum, could be important for polluted coastal environments where clean marine air masses meet DMA-containing polluted air masses. The authors also used an observation from a Chinese coastal site to imply the HIO<sub>3</sub>-HIO<sub>2</sub>-DMA nucleation mechanism is important. However, there appear to be no iodine measurements in the mentioned study (Yu 2019). Therefore, their statement that HIO<sub>3</sub>-HIO<sub>2</sub> nucleation mechanism is not sufficient while HIO<sub>3</sub>-HIO<sub>2</sub>-DMA is, is not reasonable since we do not know the exact nucleation mechanism there in the first place. I strongly suggest the authors restrict the scope of their study and try to avoid overstatements.

**Response:** Thanks for the professional suggestions. We agree with the reviewer's opinions that our previous statements in original Section 3.3 may have overstated the environmental significance of the HIO<sub>3</sub>-HIO<sub>2</sub>-DMA mechanism due to not considering the impact of other potential mechanisms. Hence, in the revised discussion of Section 3.3 (lines 268-325 of the revised Manuscript), we will discuss the environmental significance of the HIO<sub>3</sub>-HIO<sub>2</sub>-DMA system through the comparison with other potential mechanisms.

The reviewer raised a concern regarding the use of the API-TOF instrument at Mace Head and the absence of DMA in the detection. We agree with the reviewer's opinions that DMA may have insignificant contributions according to the field measurements. Therefore, in the revised discussion, we first proposed that HIO<sub>3</sub>-HIO<sub>2</sub> nucleation may be the dominant mechanism of Mace Head region. Subsequently, based on model simulations or atmospheric observations, we assessed the potential influence of DMA and other nucleation precursors (H<sub>2</sub>SO<sub>4</sub>, MSA) on HIO<sub>3</sub>-HIO<sub>2</sub> nucleation solely from a theoretical simulation perspective. Ultimately, we suggested that in pristine areas with abundant iodine sources, even if DMA and other precursors can reach high concentrations simulated in this study, their corresponding enhancements are limited.

The revised discussions are presented in lines 283-293 of the revised Manuscript as follows:

“Previous studies have demonstrated that local nucleation is primarily driven by high concentrations of HIO<sub>3</sub> (Sipilä et al. 2016). The simulated results showed that the  $J$  of HIO<sub>3</sub>-HIO<sub>2</sub> system can reach up to levels of  $10^4 \text{ cm}^{-3} \text{ s}^{-1}$ , which is consistent with the upper limit of formation rates reported in the field observation (Sipilä et al. 2016). Furthermore, we evaluated the potential impact of DMA and other precursors on the  $J$  of HIO<sub>3</sub>-HIO<sub>2</sub> system based on the concentrations from model simulations or gas-phase measurements reported at Mace Head (Yu and Luo 2014; Sipilä et al. 2016). The results indicate that DMA can promote the  $J$  significantly only at lower iodine concentrations. As the increases of iodine oxoacids, the  $J$  of HIO<sub>3</sub>-HIO<sub>2</sub>-DMA system gradually approaches that of HIO<sub>3</sub>-HIO<sub>2</sub> system, indicating a less significant enhancement by DMA. Similar patterns about the enhancement by H<sub>2</sub>SO<sub>4</sub> and MSA can also be shown. This indicates that in primitive regions with abundant iodine sources, even if the precursors (DMA, H<sub>2</sub>SO<sub>4</sub>, and MSA) can reach the high concentrations used in the simulation in this study, their corresponding enhancement is limited.”

Moreover, the reviewer raised a concern regarding the rapid nucleation rate between  $10^4$  and  $10^6 \text{ cm}^{-3} \text{ s}^{-1}$  reported by O'Dowd et al (O'Dowd et al. 2002). We found that this research did not explicitly mention the contribution of iodine species. This implies that we may overestimate the iodine-driven nucleation rate of Mace Head when using the nucleation rate between  $10^4$  and  $10^6 \text{ cm}^{-3} \text{ s}^{-1}$ . Hence, we

have removed the data of observational nucleation rates that are higher than  $10^4 \text{ cm}^{-3} \text{ s}^{-1}$  in the revised Section 3.3.

The reviewer mentioned that the nucleation mechanism in Aboa region was dominated by the  $\text{H}_2\text{SO}_4$ -A mechanism instead of iodine-dominated mechanisms. We agree with the reviewer's viewpoint. In the Aboa region, the influence of  $\text{HIO}_3$ - $\text{HIO}_2$ -DMA is relatively weaker compared with  $\text{H}_2\text{SO}_4$ -A nucleation. This has been explicitly addressed in our revised discussion, thus avoiding the exaggeration issues.

The revised discussions are as follows:

“Moreover, the simulated  $J$  of  $\text{HIO}_3$ - $\text{HIO}_2$ -DMA system is also slightly lower than the formation rates ( $0.05 - 0.12 \text{ cm}^{-3} \text{ s}^{-1}$ ) of ion-induced  $\text{H}_2\text{SO}_4$ -A system reported by field observations (Jokinen et al. 2018). Hence, due to the overall lower concentrations of iodine and amine components, the nucleation process is predominantly driven by  $\text{H}_2\text{SO}_4$  molecules. This suggests that in regions with scarce iodine and amine sources, the contribution of the DMA-enhanced  $\text{HIO}_3$ - $\text{HIO}_2$  mechanism to the particle formation is limited.”

Additionally, the reviewer raised a question that “The authors also used an observation from a Chinese coastal site to imply the  $\text{HIO}_3$ - $\text{HIO}_2$ -DMA nucleation mechanism is important. However, there appear to be no iodine measurements in the mentioned study (Yu 2019)”. We apologize for not comprehensive citing the reference, resulting in the misunderstanding of the iodine measurements in Zhejiang. In Zhejiang, Yu et al. observed NPF events driven by iodine species and detected  $\text{HIO}_3$  and  $\text{HIO}_2$  in the particle phase. The subsequent work collaborated by Xia et al. with Yu et al. (Xia et al, 2020) reported the nucleation rates observed in three different days of Zhejiang ( $J_1 = 4.2 \times 10^2$ ,  $J_2 = 5.3 \times 10^2$ ,  $J_3 = 1.0 \times 10^3 \text{ cm}^{-3} \text{ s}^{-1}$ ), which serves as the data source for us to derive the conclusion. We have provided comprehensive references to the relevant studies in the revised Manuscript.

The revised discussions are presented in lines 268-271 of the revised Manuscript as follows:

“The Zhejiang region experiences the frequent NPF events, closely associated with a high-intensity iodine-driven nucleation process (Yu et al. 2019). However, our simulation results under the conditions of Zhejiang (Xia et al., 2020; Yu et al., 2019) indicate that relying solely on  $\text{HIO}_3$ - $\text{HIO}_2$  nucleation (red curve in Figure 1(a)) appears insufficient to explain the rapid formation rates of ambient environment (gray shaded area).”

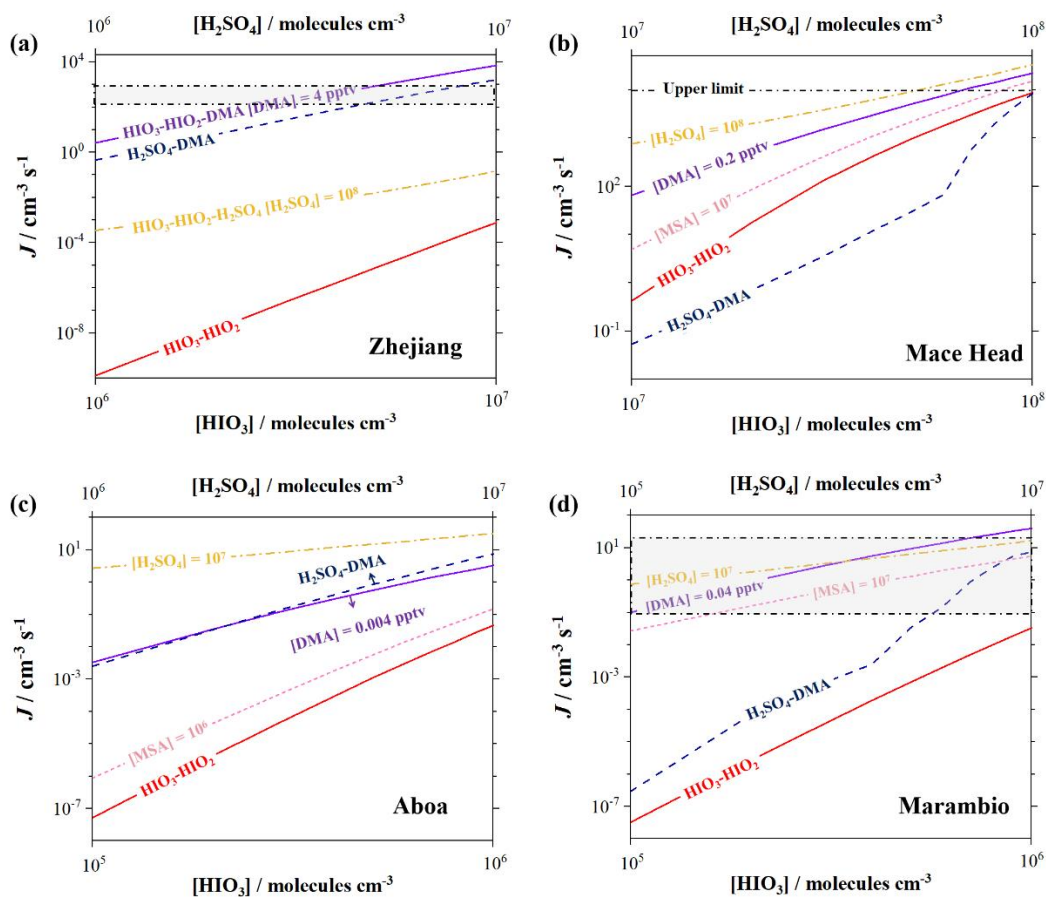

Figure 1. The cluster formation rates ( $J$ ,  $\text{cm}^{-3} \text{s}^{-1}$ ) of  $\text{HIO}_3\text{-HIO}_2$  (red),  $\text{HIO}_3\text{-HIO}_2\text{-DMA}$  (purple),  $\text{HIO}_3\text{-HIO}_2\text{-H}_2\text{SO}_4$  (yellow),  $\text{HIO}_3\text{-HIO}_2\text{-MSA}$  (pink), and  $\text{H}_2\text{SO}_4\text{-DMA}$  (blue) systems under the simulated conditions of (a) Zhejiang:  $[\text{HIO}_3] = 10^6 - 10^7$ ,  $[\text{HIO}_2] = 2 \times 10^4 - 2 \times 10^5$ ,  $[\text{H}_2\text{SO}_4] = 10^6 - 10^8$  molecules  $\text{cm}^{-3}$ , and  $[\text{DMA}] = 4$  pptv, (b) Mace Head:  $[\text{HIO}_3] = 10^7 - 10^8$ ,  $[\text{HIO}_2] = 2 \times 10^5 - 2 \times 10^6$ ,  $[\text{H}_2\text{SO}_4] = 10^7 - 10^8$ ,  $[\text{MSA}] = 10^7$  molecules  $\text{cm}^{-3}$ , and  $[\text{DMA}] = 0.2$  pptv, (c) Aboa:  $[\text{HIO}_3] = 10^5 - 10^6$ ,  $[\text{HIO}_2] = 2 \times 10^3 - 2 \times 10^4$ ,  $[\text{H}_2\text{SO}_4] = 10^6 - 10^7$ ,  $[\text{MSA}] = 10^6$  molecules  $\text{cm}^{-3}$ , and  $[\text{DMA}] = 0.004$  pptv, and (d) Marambio:  $[\text{HIO}_3] = 10^5 - 10^6$ ,  $[\text{HIO}_2] = 2 \times 10^3 - 2 \times 10^4$ ,  $[\text{H}_2\text{SO}_4] = 10^5 - 10^7$ ,  $[\text{MSA}] = 10^7$  molecules  $\text{cm}^{-3}$ , and  $[\text{DMA}] = 0.04$  pptv. The shaded area (grey) represents the actual nucleation rates observed locally.

**Major Comment 2.** Additionally, the scientific quality of this study is not high compared to the authors' previous studies and other similar studies. Most such studies will calculate the clusters with up to 8 monomers, while this study only calculated clusters with up to 5 monomers. How large are these clusters? Have they reached the critical size? I can understand the difficulty in getting clusters with 8 monomers for the three-component system, but 5 monomers are clearly not sufficient, and the authors are urged to discuss whether this can be improved.

**Response:** Thanks for the professional suggestions. According to the reviewer's suggestion, we expanded the entire system, including the ternary, binary, and unary parts, to six molecules through the same theoretical workflow to improve the scientific quality of this study. On the one hand, the collision rates of six-molecule clusters exceed the evaporation rates, tending to grow to seven or eight-molecule clusters. On the other hand, the size of six-molecule clusters reaches 1.2-1.3 nm. The sizes of these clusters are close to or have reached the size of critical nucleus (Zhang et al, 2012). Hence, the six-molecule system

can, to some extent, mitigate the issue of overestimating the system's formation rate due to the size of clusters being small. We have provided the structures of the newly added six-molecule clusters (Figure 2, which is the Figure S4 of the Supporting Information) below, along with the corresponding dynamic diameters of these clusters (Table 1). This information has also been added in Section S3 of the revised Supporting Information.

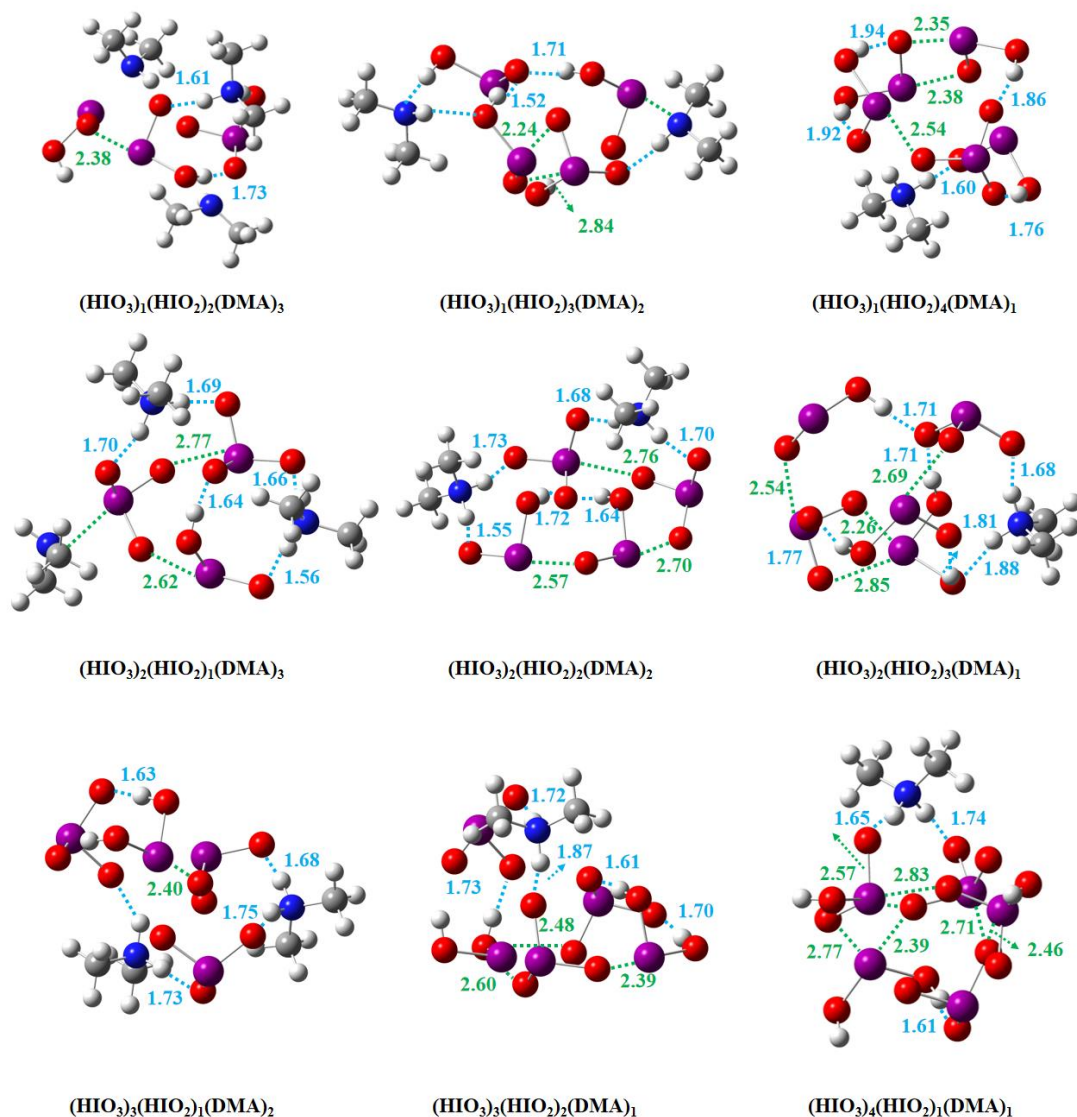

Figure 2. The most stable structures of six-molecules HIO<sub>3</sub>-HIO<sub>2</sub>-DMA clusters identified at the  $\omega$ B97X-D/6-311++G(3df,3pd) (for H, C, N, and O atoms) + aug-cc-pVTZ-PP with ECP28MDF (for I atom) level of theory. The white, grey, blue, red, and purple balls represent the H, C, N, O, and I atoms, respectively. The hydrogen bonds and halogen bonds are shown in blue and green dashed lines, respectively. The values of bond lengths are given in Å.

Table 1. The mobility diameters (nm) of HIO<sub>3</sub>-HIO<sub>2</sub>-DMA clusters.

| Clusters                                                                             | Mobile diameters (nm) |
|--------------------------------------------------------------------------------------|-----------------------|
| (HIO <sub>3</sub> ) <sub>3</sub> (HIO <sub>2</sub> ) <sub>1</sub> (DMA) <sub>2</sub> | 1.28                  |
| (HIO <sub>3</sub> ) <sub>1</sub> (HIO <sub>2</sub> ) <sub>3</sub> (DMA) <sub>2</sub> | 1.26                  |
| (HIO <sub>3</sub> ) <sub>2</sub> (HIO <sub>2</sub> ) <sub>2</sub> (DMA) <sub>2</sub> | 1.27                  |

|                                                  |      |
|--------------------------------------------------|------|
| $(\text{HIO}_3)_1(\text{HIO}_2)_2(\text{DMA})_3$ | 1.27 |
| $(\text{HIO}_3)_2(\text{HIO}_2)_1(\text{DMA})_3$ | 1.28 |
| $(\text{HIO}_3)_4(\text{HIO}_2)_1(\text{DMA})_1$ | 1.27 |
| $(\text{HIO}_3)_1(\text{HIO}_2)_4(\text{DMA})_1$ | 1.26 |
| $(\text{HIO}_3)_3(\text{HIO}_2)_2(\text{DMA})_1$ | 1.27 |
| $(\text{HIO}_3)_2(\text{HIO}_2)_3(\text{DMA})_1$ | 1.27 |

---

-----  
**Minor Comments.**

**Line 11:** Journal name should not be presented. The reference style should be consistent throughout the manuscript.

**Response:** Thanks for the reviewer's careful check. We have changed the reference style in the first line of abstract.

-----  
**Line 12-13:** Is there clear evidence supporting the author's claim that the mentioned mechanism cannot explain NPF in broad marine regions? Or is it just that it may be insufficient to explain all cases? It sounds like quite a strong statement the authors are trying to make.

**Response:** Thanks for the professional suggestions. As suggested by the reviewer, only in certain coastal areas influenced by urban air masses, such as the Zhejiang region, former studies indicated that iodine species could drive nucleation processes, while the  $\text{HIO}_3$ - $\text{HIO}_2$  nucleation mechanism may not sufficiently explain the field observation results (Yu et al, 2019; Xia et al, 2020; Ma et al, 2023; Zu et al, 2024), prompting us to further consider the involvement of DMA. Consequently, the statements made in the abstract were exaggerated. Hence, we have adjusted the statement in lines 12-13 of the revised Manuscript as follow:

“However,  $\text{HIO}_3$ - $\text{HIO}_2$  nucleation may not effectively drive the observed rapid new particle formation (NPF) in certain coastal regions influenced by urban air masses.”

-----  
**Line 32:** “are originated” → “originate”

**Line 33:** are thought

**Line 34:** coastal areas

**Response:** Thanks for the reviewer's suggestions. We have modified the above corresponding mistakes in the revised manuscript.

-----  
**Line 40:** How did Yu 2019 measure  $\text{HIO}_2$ ? Could the authors confirm this?

**Response:** Yu and co-workers used a nano-microorifice uniform deposit impactor (nano-MOUDI; MSP Corp, Shoreview, MN) to collect the sample (10-18 nm) of aerosols or  $\text{PM}_{2.5}$  during NPF events. Subsequently, they detected  $\text{IO}_2^-$  signal, which may be the corresponding result of  $\text{HIO}_2$  entering the mass spectrometry, in nano-MOUDI sample through an integrated mass spectrum of molecular ions (Yu et al, 2019).

-----  
**Line 43-45:** The statement seems different than the definitive statement in the abstract. Could the authors clarify: is iodine nucleation not explaining broad marine NPF or is it sometimes insufficient? Do we know where iodine is important and when they are not? Is there field evidence?

**Response:** Thanks for the reviewer's suggestions. We have realized the exaggeration issue raised in the abstract. To the best of our knowledge, iodine oxoacids nucleation is significant in clean marine

environments, supported by field evidence from such as the Mace Head region (Sipila et al, 2016). However, it may be sometimes insufficient in polluted coastal regions (Ma et al, 2023), such as Zhejiang regions (Yu et al, 2019; Zu et al, 2024). In order to provide an accurate and reasonable introduction to the background of iodine oxoacids nucleation, we have adjusted the statement in lines 62-66 of the revised Manuscript as follow:

“In short, the iodine oxoacids ( $\text{HIO}_x$ ,  $x = 2, 3$ ) can drive rapid particle formation, and they may play an important role in marine and polar NPF process. However, in certain coastal areas influenced by urban air masses, such as the Zhejiang region, former studies indicated that iodine species could drive nucleation processes, while the  $\text{HIO}_3$ - $\text{HIO}_2$  nucleation mechanism may not sufficiently explain the field observation results (Yu et al. 2019; Ma et al. 2023; Zu et al. 2024; Xia et al. 2020), which indicates that other nucleation precursors may be involved.”

-----  
**Line 136:** The references to tables S1-S4 appear to be missing. Should they be added somewhere? Or otherwise, reorder the tables to make S5 the S1.

**Response:** Thanks for the reviewer’s suggestions. We listed the detailed collision and total evaporation frequencies of the  $\text{HIO}_3$ - $\text{HIO}_2$ -DMA system at all simulated temperatures and condensation sinks in Tables S1-S4. The references to Tables S1-S4 are in lines 151-152 of the revised manuscript.

-----  
**Lines 150-159:** Interesting observations here related to the proton transfer. Since iodine is a halogen, could the authors also comment on the role of halogen bonding in cluster formation? Is the halogen bonding important? Previous studies that the authors have cited (e.g., Zhang 2022) seem to point to a strong involvement of halogen bonds. Therefore, I encourage the authors to have a detailed session discussing the halogen bonds and a further session comparing the halogen bonds and hydrogen bonds, which are more important? Additionally, the authors suggest that DMA competes for a proton from  $\text{HIO}_2$ , giving the impression that they are separate things while in reality, it appears to be synergistic effects (Figure 4), instead of competition (i.e., adding DMA would never reduce the nucleation rates).

**Response:** Thanks for the professional suggestions. We have added the discussion about the influence of proton transfer, halogen bonds, and hydrogen bonds on the stability of clusters.

“It is worth noting that, in terms of the stability (evaluated by  $\Delta G$ ) of clusters, the proton transfer plays a crucial role. Taking two 3-molecule clusters,  $(\text{HIO}_3)_2(\text{HIO}_2)_1$  ( $\Delta G = -30.05 \text{ kcal mol}^{-1}$ ) and  $(\text{HIO}_3)_1(\text{HIO}_2)_1(\text{DMA})_1$  ( $\Delta G = -35.19 \text{ kcal mol}^{-1}$ ), as an example, we observed that the  $(\text{HIO}_3)_2(\text{HIO}_2)_1$  cluster with higher energy is formed through three XBs and one HB, while  $(\text{HIO}_3)_1(\text{HIO}_2)_1(\text{DMA})_1$  cluster with lower energy is formed through three HBs after proton transfer. Additionally, when the number of proton transfers is the same, clusters with more halogen bonds formed by  $\text{HIO}_2$  generally have lower  $\Delta G$ , which can be seen from  $(\text{HIO}_3)_1(\text{HIO}_2)_2(\text{DMA})_1$  ( $\Delta G = -50.07 \text{ kcal mol}^{-1}$ , formed by three XBs and two HBs) and  $(\text{HIO}_2)_4$  ( $\Delta G = -58.08 \text{ kcal mol}^{-1}$ , formed by four XBs) clusters. Similar results can also be observed in other ternary clusters.”

Additionally, the reviewer pointed out that the relationship between DMA and  $\text{HIO}_2$  appears to be to synergistic effects rather than competition. This is a valuable suggestion. Due to  $\text{HIO}_2$  molecules being amphoteric rather than basic, we have removed the original statement of the competition between two bases (DMA and  $\text{HIO}_2$ ) during nucleation. As suggested by the reviewer, we have added the statements in lines 274-277 of the revised Manuscript as follows:

“Notably, the increase of the concentrations of  $\text{HIO}_2$  and DMA can both enhance the  $J$  to match the field observations, indicating that  $\text{HIO}_2$  and DMA molecules exhibit a synergistic effect on  $\text{HIO}_3$

nucleation, which may have significant contributions to NPF events in the polluted coastal areas where marine iodine species intersect with high concentrations of DMA.”

-----  
**Lines 161-176:** What is the nucleation rate simulated by this study for Figure 3? Does it agree with the field observation they refer to? Analyzing the branching ratio has to be based on a reasonable agreement between the field observation and their simulation.

**Response:** The simulated cluster formation rate of original Figure 3 is  $2.1 \times 10^4 \text{ cm}^{-3} \text{ s}^{-1}$ , which is consistent with the reported results of  $10^4 \text{ cm}^{-3} \text{ s}^{-1}$  in the corresponding field observations (Sipila et al, 2016).

-----  
**Lines 173-176:** The discussion here about DMA detection makes no sense. Even if the nitrate-CIMS did not measure DMA, the APi-TOF deployed in the mentioned paper should have captured DMA. Have Sipila et al. (2016) measured DMA with their APi-TOF? Note, APi-TOF would capture DMA if there were over  $5 \times 10^5 \text{ molec. cm}^{-3}$  levels of DMA.

**Response:** Thanks for the valuable suggestions. Our previous discussion was not comprehensive enough and appeared to be contradictory to the field observation results. Therefore, we have removed the discussion about DMA detection and modified the statements of the role of DMA in the revised Section 3.3 to avoid exaggerating the implication of this manuscript.

-----  
**Lines 255-257:** Are there iodine measurements at the mentioned site? Where did the author get the concentrations? If there were no measurements of iodine species, how did the author derive the conclusion that the nucleation rates are too high to be explained?

**Response:** In Zhejiang, Yu et al. observed NPF events driven by iodine species and detected  $\text{HIO}_3$  and  $\text{HIO}_2$  in the particle phase. The subsequent work collaborated by Xia et al. with Yu et al. (Xia et al, 2020) reported the nucleation rates observed in three different days of Zhejiang ( $J_1 = 4.2 \times 10^2$ ,  $J_2 = 5.3 \times 10^2$ ,  $J_3 = 1.0 \times 10^3 \text{ cm}^{-3} \text{ s}^{-1}$ ), which serves as the data source for us to derive the conclusion. The gas-phase concentration of  $\text{HIO}_3$  is set based on the data provided by Xia et al (Xia et al, 2020). Due to the lack of the data of  $\text{HIO}_2$ , we estimated the gas-phase concentration of  $\text{HIO}_2$  based on the ratio of  $[\text{HIO}_3]$  to  $[\text{HIO}_2]$  in the field observations (Sipila et al. 2016) and CLOUD experiment (He et al. 2021), which showed that the ratio of  $[\text{HIO}_3]$  to  $[\text{HIO}_2]$  is about 20 to 100 depending on the concentration of iodine vapor. The ratio presented in the main text was 50 according to the former field observations in Mace Head (Sipila et al. 2016) and the other results obtained from two different ratios (20 and 100) of  $[\text{HIO}_3]$  and  $[\text{HIO}_2]$  can be seen from the Section S5 of the Supporting Information.

-----  
**Figure 5:** When the authors calculate the  $\text{HIO}_3$ - $\text{HIO}_2$  rates, which they suggest citing from another study, did the author use the same size of clusters as the  $\text{HIO}_3$ - $\text{HIO}_2$ -DMA system (5 monomers in this system)? This will also influence the nucleation rates of these systems.

**Response:** Yes, we used the same size of  $\text{HIO}_3$ - $\text{HIO}_2$  clusters (5 monomers before, 6 monomers now) with the  $\text{HIO}_3$ - $\text{HIO}_2$ -DMA clusters, aiming to eliminate errors caused by the size of clusters when calculating cluster formation rates.

-----  
**Figure 5A:** The field observation range is very misleading. How is it possible that the nucleation rate in the ambient reaches  $1 \times 10^6$ ? Did the O’Dowd 2002 paper measure iodine species? If not, what is the acid and nucleation rate range in the mentioned Sipila 2016 paper? The authors should use a dataset that has



both acid and nucleation rate measurements instead of assembling different datasets to prove their points. The authors mentioned one case from the Sipila 2016 with a  $1e4$  nucleation rate and  $1e8$   $\text{HIO}_3$ ; it appears it agrees with their high-end  $\text{HIO}_3$ - $\text{HIO}_2$  simulation and low-end of  $\text{HIO}_3$ - $\text{HIO}_2$ -DMA simulation. How can they conclude from this?

**Response:** Thanks for the professional suggestions. O'Dowd et al (O'Dowd et al. 2002) measured a rapid nucleation rate between  $10^4$  and  $10^6 \text{ cm}^{-3} \text{ s}^{-1}$ , but did not explicitly mention the contribution of iodine species. This implies that we may overestimate the iodine-driven nucleation rate of Mace Head. Hence, we have removed the data of observational nucleation rates that are higher than  $10^4 \text{ cm}^{-3} \text{ s}^{-1}$ .

As the reviewer mentioned, our simulation showed that the observational nucleation rates agree with the upper limit of  $\text{HIO}_3$ - $\text{HIO}_2$  system and the lower limit of  $\text{HIO}_3$ - $\text{HIO}_2$ -DMA system. This indicates that the enhancing effect of DMA in such scenarios may be overestimated due to the overestimation of [DMA] in the simulation compared to the actual situation. Moreover, in pristine areas with abundant iodine sources, even if DMA and other precursors can reach high concentrations simulated in this study, their corresponding enhancements are limited. We have added the discussion in lines 291-294 of the revised Manuscript.

-----

**Figure 5:** What are the shades in the figure? It is very confusing since I do not find an explanation for this. Please clarify. Additionally, the authors should compare their  $\text{HIO}_3$ - $\text{HIO}_2$  nucleation rate with the experimental work (He 2021?) to see whether their rates are reasonable before deriving any meaningful conclusions.

**Response:** Thanks for the professional suggestions. The shades in original Figure 5 represent the range of nucleation rates covered by the ternary  $\text{HIO}_3$ - $\text{HIO}_2$ -DMA and binary  $\text{HIO}_3$ - $\text{HIO}_2$  systems. The upper limit corresponds to the scenario where the precursor concentrations are simultaneously at their maximum values, while the lower limit corresponds to the scenario where the precursor concentrations are simultaneously at their minimum values. To avoid the difficulty for readers caused by excessive information in the figure, we have eliminated the original presentation method that combined upper and lower limits with shaded areas.

As suggested by the reviewer, we have conducted the comparison between experimental results and the simulated formation rates of the expanded six-molecule  $\text{HIO}_3$ - $\text{HIO}_2$  system, and the corresponding results are presented in Figure 3. The simulation was performed under the same conditions with CLOUD experiment (He et al, 2021) ( $[\text{HIO}_3] = 10^6 - 10^8 \text{ molecules cm}^{-3}$ ,  $[\text{HIO}_2] = 2 \times 10^4 - 2 \times 10^6 \text{ molecules cm}^{-3}$ ,  $T = 283$  (red),  $263$  (blue) K, and  $\text{CS} = 2.2 \times 10^{-3} \text{ s}^{-1}$ ). The circles in Figure 3 represent the experimental results, while the squares represent the theoretical results. As shown in Figure 3, at lower  $T$ , the simulated formation rates are in good agreement with the experimental results. At higher  $T$ , the simulated results exhibit a similar growth trend to the experimental results, although the simulated rates are generally about one order of magnitude higher. This indicates that the theoretical method we employed exhibits a high level of accuracy, particularly at lower  $T$ . As a result, the predictive results obtained through these simulations can be reliable. We have added the discussion in Section S2 of the revised Supporting Information.

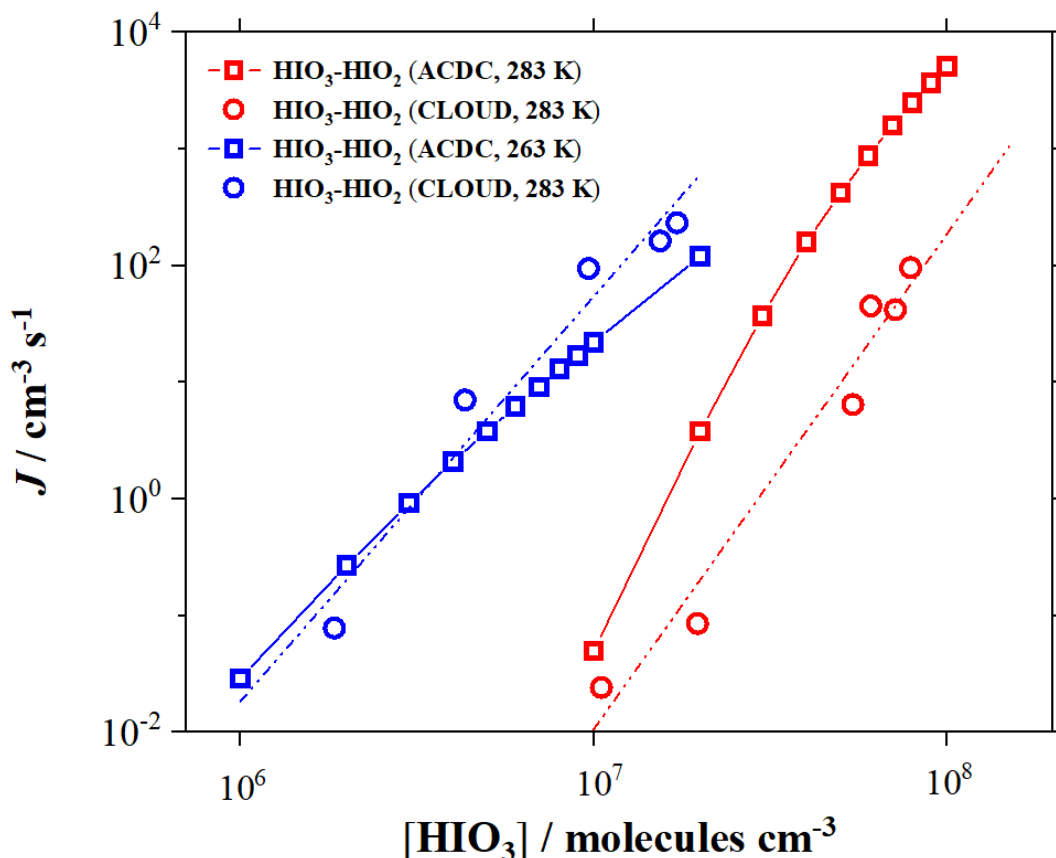

Figure 3. The cluster formation rates ( $J$ ,  $\text{cm}^{-3} \text{s}^{-1}$ ) of  $\text{HIO}_3\text{-HIO}_2$  system obtained from experiment (CLOUD) and theoretical (ACDC) results. The simulation was performed under the conditions of  $[\text{HIO}_3] = 10^6 - 10^8$ ,  $[\text{HIO}_2] = 2 \times 10^4 - 2 \times 10^6$ ,  $T = 283$  (red), 263 (blue) K, and  $\text{CS} = 2.2 \times 10^{-3} \text{s}^{-1}$ . The circles represent the experimental results, while the squares represent the theoretical results.

-----  
**Lines 264-272:** The original paper from Jokinen et al. 2018 (10.1126/sciadv.aat9744) clearly suggests that SA-NH<sub>3</sub> was the nucleation mechanism there and did not measure DMA in the APi-TOF (Fig 2 of that study). This study's calculation has no relevance to the conditions there. Also, please cite the mentioned paper for the discussion here.

**Response:** Thanks for the professional suggestions. According to the reviewer's suggestions, we are aware that our statement may overlook the contributions of some more significant mechanisms. The simulated  $J$  of  $\text{HIO}_3\text{-HIO}_2\text{-DMA}$  system is lower than the formation rates ( $0.05 - 0.12 \text{cm}^{-3} \text{s}^{-1}$ ) of ion-induced  $\text{H}_2\text{SO}_4\text{-A}$  system reported by field observations (Jokinen et al. 2018). Hence, due to the overall lower concentrations of iodine and amine components, the nucleation process is predominantly driven by  $\text{H}_2\text{SO}_4\text{-A}$  system clearly. This suggests that in regions with scarce iodine and amine sources, the contribution of the DMA-enhanced  $\text{HIO}_3\text{-HIO}_2$  mechanism to the particle formation is limited. We have added the discussion in Section 3.3 of the revised manuscript and cited the mentioned paper for the discussion.

-----  
 We have tried our best to improve the manuscript and the main changes have been highlighted in yellow in the revised manuscript.

Sincerely,  
Xiuhui Zhang  
Key Laboratory of Cluster Science Ministry of Education of China  
School of Chemistry and Chemical Engineering  
Beijing Institute of Technology  
Beijing 100081, P.R. China  
Email: zhangxiuhui@bit.edu.cn

## Reference:

- Almeida, J., S. Schobesberger, A. Kurten, I. K. Ortega, O. Kupiainen-Maatta, A. P. Praplan, A. Adamov, A. Amorim, F. Bianchi, M. Breitenlechner, A. David, J. Dommen, N. M. Donahue, A. Downard, E. Dunne, J. Duplissy, S. Ehrhart, R. C. Flagan, A. Franchin, R. Guida, J. Hakala, A. Hansel, M. Heinritzi, H. Henschel, T. Jokinen, H. Junninen, M. Kajos, J. Kangasluoma, H. Keskinen, A. Kupc, T. Kurten, A. N. Kvashin, A. Laaksonen, K. Lehtipalo, M. Leiminger, J. Leppa, V. Loukonen, V. Makhmutov, S. Mathot, M. J. McGrath, T. Nieminen, T. Olenius, A. Onnela, T. Petaja, F. Riccobono, I. Riipinen, M. Rissanen, L. Rondo, T. Ruuskanen, F. D. Santos, N. Sarnela, S. Schallhart, R. Schnitzhofer, J. H. Seinfeld, M. Simon, M. Sipila, Y. Stozhkov, F. Stratmann, A. Tome, J. Trostl, G. Tsagkogeorgas, P. Vaattovaara, Y. Viisanen, A. Virtanen, A. Vrtala, P. E. Wagner, E. Weingartner, H. Wex, C. Williamson, D. Wimmer, P. L. Ye, T. Yli-Juuti, K. S. Carslaw, M. Kulmala, J. Curtius, U. Baltensperger, D. R. Worsnop, H. Vehkamäki, and J. Kirkby. 2013. 'Molecular understanding of sulphuric acid-amine particle nucleation in the atmosphere', *Nature*, 502: 359-+.
- Chen, D. P., D. F. Li, C. W. Wang, F. Y. Liu, and W. L. Wang. 2020. 'Formation mechanism of methanesulfonic acid and ammonia clusters: A kinetics simulation study', *Atmospheric Environment*, 222.
- Chen, D. P., D. F. Li, C. W. Wang, Y. Luo, F. Y. Liu, and W. L. Wang. 2020. 'Atmospheric implications of hydration on the formation of methanesulfonic acid and methylamine clusters: A theoretical study', *Chemosphere*, 244.
- Dall'Osto, M., R. L. Airs, R. Beale, C. Cree, M. F. Fitzsimons, D. Beddows, R. M. Harrison, D. Ceburnis, C. O'Dowd, M. Rinaldi, M. Paglione, A. Nenes, S. Decesari, and R. Simó. 2019. 'Simultaneous Detection of Alkylamines in the Surface Ocean and Atmosphere of the Antarctic Sympagic Environment', *Acs Earth and Space Chemistry*, 3: 854-+.
- Dall'Osto, M., D. C. S. Beddows, P. Tunved, R. Krejci, J. Ström, H. C. Hansson, Y. J. Yoon, K. T. Park, S. Becagli, R. Udisti, T. Onasch, C. D. O'Dowd, R. Simo, and R. M. Harrison. 2017. 'Arctic sea ice melt leads to atmospheric new particle formation', *Scientific Reports*, 7.
- Elm, J. 2019. 'An Atmospheric Cluster Database Consisting of Sulfuric Acid, Bases, Organics, and Water', *Acs Omega*, 4: 10965-74.
- . 2021a. 'Clusteromics I: Principles, Protocols, and Applications to Sulfuric Acid-Base Cluster Formation', *Acs Omega*, 6: 7804-14.
- . 2021b. 'Clusteromics II: Methanesulfonic Acid-Base Cluster Formation', *Acs Omega*, 6: 17035-44.
- Gong, J., T. Zhu, H. Kipen, G. Wang, M. Hu, Q. Guo, P. Ohman-Strickland, S. E. Lu, Y. Wang, P. Zhu, D. Q. Rich, W. Huang, and J. Zhang. 2014. 'Comparisons of ultrafine and fine particles in their

- associations with biomarkers reflecting physiological pathways', *Environmental Science and Technology*, 48: 5264-73.
- Haywood, J., and O. Boucher. 2000. 'Estimates of the direct and indirect radiative forcing due to tropospheric aerosols: A review', *Reviews of Geophysics*, 38: 513-43.
- He, X. C., Y. J. Tham, L. Dada, M. Y. Wang, H. Finkenzeller, D. Stolzenburg, S. Iyer, M. Simon, A. Kurten, J. L. Shen, B. Rorup, M. Rissanen, S. Schobesberger, R. Baalbaki, D. S. Wang, T. K. Koenig, T. Jokinen, N. Sarnela, L. J. Beck, J. Almeida, S. Amanatidis, A. Amorim, F. Ataci, A. Baccarini, B. Bertozzi, F. Bianchi, S. Brilke, L. Caudillo, D. X. Chen, R. Chiu, B. W. Chu, A. Dias, A. J. Ding, J. Dommen, J. Duplissy, I. El Haddad, L. G. Carracedo, M. Granzin, A. Hansel, M. Heinritzi, V. Hofbauer, H. Junninen, J. Kangasluoma, D. Kemppainen, C. Kim, W. M. Kong, J. E. Krechmer, A. Kvashin, T. Laitinen, H. Lamkaddam, C. P. Lee, K. Lehtipalo, M. Leiminger, Z. J. Li, V. Makhmutov, H. E. Manninen, G. Marie, R. Marten, S. Mathot, R. L. Mauldin, B. Mentler, O. Mohler, T. Muller, W. Nie, A. Onnela, T. Petaja, J. Pfeifer, M. Philippov, A. Ranjithkumar, A. Saiz-Lopez, I. Salma, W. Scholz, S. Schuchmann, B. Schulze, G. Steiner, Y. Stozhkov, C. Tauber, A. Tome, R. C. Thakur, O. Vaisanen, M. Vazquez-Pufleau, A. C. Wagner, Y. H. Wang, S. K. Weber, P. M. Winkler, Y. S. Wu, M. Xiao, C. Yan, Q. Ye, A. Ylisirnio, M. Zauner-Wieczorek, Q. Z. Zha, P. T. Zhou, R. C. Flagan, J. Curtius, U. Baltensperger, M. Kulmala, V. M. Kerminen, T. Kurten, N. M. Donahue, R. Volkamer, J. Kirkby, D. R. Worsnop, and M. Sipila. 2021. 'Role of iodine oxoacids in atmospheric aerosol nucleation', *Science*, 371: 589-+.
- He, Xu-Cheng, Mario Simon, Siddharth Iyer, Hong-Bin Xie, Birte Rörup, Jiali Shen, Henning Finkenzeller, Dominik Stolzenburg, Rongjie Zhang, Andrea Baccarini, Yee Jun Tham, Mingyi Wang, Stavros Amanatidis, Ana A. Piedehierro, Antonio Amorim, Rima Baalbaki, Zoé Brasseur, Lucía Caudillo, Biwu Chu, Lubna Dada, Jonathan Duplissy, Imad El Haddad, Richard C. Flagan, Manuel Granzin, Armin Hansel, Martin Heinritzi, Victoria Hofbauer, Tuija Jokinen, Deniz Kemppainen, Weimeng Kong, Jordan Krechmer, Andreas Kürten, Houssni Lamkaddam, Brandon Lopez, Fangfang Ma, Naser G. A. Mahfouz, Vladimir Makhmutov, Hanna E. Manninen, Guillaume Marie, Ruby Marten, Dario Massabò, Roy L. Mauldin, Bernhard Mentler, Antti Onnela, Tuukka Petäjä, Joschka Pfeifer, Maxim Philippov, Ananth Ranjithkumar, Matti P. Rissanen, Siegfried Schobesberger, Wiebke Scholz, Benjamin Schulze, Mihnea Surdu, Roseline C. Thakur, António Tomé, Andrea C. Wagner, Dongyu Wang, Yonghong Wang, Stefan K. Weber, André Welti, Paul M. Winkler, Marcel Zauner-Wieczorek, Urs Baltensperger, Joachim Curtius, Theo Kurtén, Douglas R. Worsnop, Rainer Volkamer, Katrianne Lehtipalo, Jasper Kirkby, Neil M. Donahue, Mikko Sipilä, and Markku Kulmala. 2023. 'Iodine oxoacids enhance nucleation of sulfuric acid particles in the atmosphere', 382: 1308-14.
- Jokinen, T., M. Sipilä, J. Kontkanen, V. Vakkari, P. Tisler, E. M. Duplissy, H. Junninen, J. Kangasluoma, H. E. Manninen, T. Petäjä, M. Kulmala, D. R. Worsnop, J. Kirkby, A. Virkkula, and V. M. Kerminen. 2018. 'Ion-induced sulfuric acid-ammonia nucleation drives particle formation in coastal Antarctica', *Science Advances*, 4.
- Kalivitis, N., V. M. Kerminen, G. Kouvarakis, I. Stavroulas, A. Bougiatioti, A. Nenes, H. E. Manninen, T. Petäjä, M. Kulmala, and N. Mihalopoulos. 2015. 'Atmospheric new particle formation as a source of CCN in the eastern Mediterranean marine boundary layer', *Atmospheric Chemistry and Physics*, 15: 9203-15.
- Kurtén, T., V. Loukonen, H. Vehkamäki, and M. Kulmala. 2008. 'Amines are likely to enhance neutral and ion-induced sulfuric acid-water nucleation in the atmosphere more effectively than

- ammonia', *Atmospheric Chemistry and Physics*, 8: 4095-103.
- Lee, Shan-Hu, Hamish Gordon, Huan Yu, Katrianne Lehtipalo, Ryan Haley, Yixin Li, and Renyi Zhang. 2019. 'New Particle Formation in the Atmosphere: From Molecular Clusters to Global Climate', *Journal of Geophysical Research: Atmospheres*, 124: 7098-146.
- Liu, L., H. Li, H. J. Zhang, J. Zhong, Y. Bai, M. F. Ge, Z. S. Li, Y. Chen, and X. H. Zhang. 2018. 'The role of nitric acid in atmospheric new particle formation', *Physical Chemistry Chemical Physics*, 20: 17406-14.
- Liu, L., F. Q. Yu, L. Du, Z. Yang, J. S. Francisco, and X. H. Zhang. 2021. 'Rapid sulfuric acid-dimethylamine nucleation enhanced by nitric acid in polluted regions', *Proceedings of the National Academy of Sciences of the United States of America*, 118.
- Liu, Z. Y., M. Li, X. F. Wang, Y. H. Liang, Y. R. Jiang, J. Chen, J. S. Mu, Y. J. Zhu, H. Meng, L. X. Yang, K. Y. Hou, Y. F. Wang, and L. K. Xue. 2022. 'Large contributions of anthropogenic sources to amines in fine particles at a coastal area in northern China in winter', *Science of The Total Environment*, 839.
- Ma, F. F., H. B. Xie, R. J. Zhang, L. H. Su, Q. Jiang, W. H. Tang, J. W. Chen, M. Engsvang, J. Elm, and X. C. He. 2023. 'Enhancement of Atmospheric Nucleation Precursors on Iodic Acid- Induced Nucleation: Predictive Model and Mechanism', *Environmental Science & Technology*, 57: 6944-54.
- Murphy, D. M., and A. R. Ravishankara. 2018. 'Trends and patterns in the contributions to cumulative radiative forcing from different regions of the world', *Proceedings of the National Academy of Sciences of the United States of America*, 115: 13192-97.
- Nault, B. A., P. Campuzano-Jost, D. A. Day, D. S. Jo, J. C. Schroder, H. M. Allen, R. Bahreini, H. S. Bian, D. R. Blake, M. Chin, S. L. Clegg, P. R. Colarco, J. D. Crouse, M. J. Cubison, P. F. DeCarlo, J. E. Dibb, G. S. Diskin, A. Hodzic, W. W. Hu, J. M. Katich, M. J. Kim, J. K. Kodros, A. Kupc, F. D. Lopez-Hilfiker, E. A. Marais, A. M. Middlebrook, J. A. Neuman, J. B. Nowak, B. B. Palm, F. Paulot, J. R. Pierce, G. P. Schill, E. Scheuer, J. A. Thornton, K. Tsigaridis, P. O. Wennberg, C. J. Williamson, and J. L. Jimenez. 2021. 'Chemical transport models often underestimate inorganic aerosol acidity in remote regions of the atmosphere', *Communications Earth & Environment*, 2.
- O'Dowd, C. D., and G. de Leeuw. 2007. 'Marine aerosol production: a review of the current knowledge', *Philos Trans A Math Phys Eng Sci*, 365: 1753-74.
- O'Dowd, C. D., K. Hameri, J. Makela, M. Vakeva, P. Aalto, G. de Leeuw, G. J. Kunz, E. Becker, H. C. Hansson, A. G. Allen, R. M. Harrison, H. Berresheim, M. Geever, S. G. Jennings, and M. Kulmala. 2002. 'Coastal new particle formation: Environmental conditions and aerosol physicochemical characteristics during nucleation bursts', *Journal of Geophysical Research-Atmospheres*, 107.
- Pope, C. Arden, III, and Douglas W. Dockery. 2006. 'Health effects of fine particulate air pollution: lines that connect', *Journal of the Air & Waste Management Association*, 56: 709-42.
- Schmitz, G., and J. Elm. 2020. 'Assessment of the DLPNO Binding Energies of Strongly Noncovalent Bonded Atmospheric Molecular Clusters', *Acs Omega*, 5: 7601-12.
- Shen, J. W., J. Elm, H. B. Xie, J. W. Chen, J. F. Niu, and H. Vehkamäki. 2020. 'Structural Effects of Amines in Enhancing Methanesulfonic Acid-Driven New Particle Formation', *Environmental Science & Technology*, 54: 13498-508.
- Sipila, M., N. Sarnela, T. Jokinen, H. Henschel, H. Junninen, J. Kontkanen, S. Richters, J. Kangasluoma,

- A. Franchin, O. Perakyla, M. P. Rissanen, M. Ehn, H. Vehkamäki, T. Kurten, T. Berndt, T. Petaja, D. Worsnop, D. Ceburnis, V. M. Kerminen, M. Kulmala, and C. O'Dowd. 2016. 'Molecular-scale evidence of aerosol particle formation via sequential addition of HIO<sub>3</sub>', *Nature*, 537: 532-34.
- Sipilä, M., N. Sarnela, T. Jokinen, H. Henschel, H. Junninen, J. Kontkanen, S. Richters, J. Kangasluoma, A. Franchin, O. Peräkylä, M. P. Rissanen, M. Ehn, H. Vehkamäki, T. Kurten, T. Berndt, T. Petäjä, D. Worsnop, D. Ceburnis, V. M. Kerminen, M. Kulmala, and C. O'Dowd. 2016. 'Molecular-scale evidence of aerosol particle formation via sequential addition of HIO<sub>3</sub>', *Nature*, 537: 532-34.
- Wang, M. Y., W. M. Kong, R. Marten, X. C. He, D. X. Chen, J. Pfeifer, A. Heitto, J. Kontkanen, L. Dada, A. Kurten, T. Yli-Juuti, H. E. Manninen, S. Amanatidis, A. Amorim, R. Baalbaki, A. Baccarini, D. M. Bell, B. Bertozzi, S. Bräkling, S. Brilke, L. C. Murillo, R. Chiu, B. W. Chu, L. P. De Menezes, J. Duplissy, H. Finkenzeller, L. G. Carracedo, M. Granzin, R. Guida, A. Hansel, V. Hofbauer, J. Krechmer, K. Lehtipalo, H. Lamkaddam, M. Lampimäki, C. P. Lee, V. Makhmutov, G. Marie, S. Mathot, R. L. Mauldin, B. Mentler, T. Müller, A. Onnela, E. Partoll, T. Petäjä, M. Philippov, V. Pospisilova, A. Ranjithkumar, M. Rissanen, B. Rörup, W. Scholz, J. L. Shen, M. Simon, M. Sipilä, G. Steiner, D. Stolzenburg, Y. J. Tham, A. Tomé, A. C. Wagner, D. Y. S. Wang, Y. H. Wang, S. K. Weber, P. M. Winkler, P. J. Wlasits, Y. H. Wu, M. Xiao, Q. Ye, M. Zauner-Wieczorek, X. Q. Zhou, R. Volkamer, I. Riipinen, J. Dommen, J. Curtius, U. Baltensperger, M. Kulmala, D. R. Worsnop, J. Kirkby, J. H. Seinfeld, I. El-Haddad, R. C. Flagan, and N. M. Donahue. 2020. 'Rapid growth of new atmospheric particles by nitric acid and ammonia condensation', *Nature*, 581: 184-+.
- Wang, M. Y., M. Xiao, B. Bertozzi, G. Marie, B. Rörup, B. Schulze, R. Bardakov, X. C. He, J. L. Shen, W. Scholz, R. Marten, L. Dada, R. Baalbaki, B. Lopez, H. Lamkaddam, H. E. Manninen, A. Amorim, F. Ataei, P. Bogert, Z. Brasseur, L. Caudillo, L. P. De Menezes, J. Duplissy, A. M. L. Ekman, H. Finkenzeller, L. G. Carracedo, M. Granzin, R. Guida, M. Heinritzi, V. Hofbauer, K. Höhler, K. Korhonen, J. E. Krechmer, A. Kürten, K. Lehtipalo, N. G. A. Mahfouz, V. Makhmutov, D. Massabò, S. Mathot, R. L. Mauldin, B. Mentler, T. Müller, A. Onnela, T. Petäjä, M. Philippov, A. A. Piedehierro, A. Pozzer, A. Ranjithkumar, M. Schervish, S. Schobesberger, M. Simon, Y. Stozhkov, A. Tomé, N. S. Umo, F. Vogel, R. Wagner, D. S. Wang, S. K. Weber, A. Welti, Y. S. Wu, M. Zauner-Wieczorek, M. Sipilä, P. M. Winkler, A. Hansel, U. Baltensperger, M. Kulmala, R. C. Flagan, J. Curtius, I. Riipinen, H. Gordon, J. Lelieveld, I. El-Haddad, R. Volkamer, D. R. Worsnop, T. Christoudias, J. Kirkby, O. Möhler, and N. M. Donahue. 2022. 'Synergistic HNO<sub>3</sub>-H<sub>2</sub>SO<sub>4</sub>-NH<sub>3</sub> upper tropospheric particle formation', *Nature*, 605: 483-+.
- Xia, D., J. Chen, H. Yu, H. B. Xie, Y. Wang, Z. Wang, T. Xu, and D. T. Allen. 2020. 'Formation Mechanisms of Iodine-Ammonia Clusters in Polluted Coastal Areas Unveiled by Thermodynamic and Kinetics Simulations', *Environmental Science & Technology*, 54: 9235-42.
- Yu, F., and G. Luo. 2014. 'Modeling of gaseous methylamines in the global atmosphere: impacts of oxidation and aerosol uptake', *Atmospheric Chemistry and Physics*, 14: 12455-64.
- Yu, Huan, Lili Ren, Xiangpeng Huang, Mingjie Xie, Jun He, and Hang Xiao. 2019. 'Iodine speciation and size distribution in ambient aerosols at a coastal new particle formation hotspot in China', *Atmospheric Chemistry and Physics*, 19: 4025-39.
- Zhang, R. J., H. B. Xie, F. F. Ma, J. W. Chen, S. Iyer, M. Simon, M. Heinritzi, J. L. Shen, Y. J. Tham, T.

- Kurten, D. R. Worsnop, J. Kirkby, J. Curtius, M. Sipila, M. Kulmala, and X. C. He. 2022. 'Critical Role of Iodous Acid in Neutral Iodine Oxoacid Nucleation', *Environmental Science & Technology*.
- Zhang, R., A. Khalizov, L. Wang, M. Hu, and W. Xu. 2012. 'Nucleation and growth of nanoparticles in the atmosphere', *Chemical Reviews*, 112: 1957-2011.
- Zhang, Renyi. 2010. 'Getting to the Critical Nucleus of Aerosol Formation', *Science*, 328: 1366-67.
- Zhu, Y. J., K. Li, Y. J. Shen, Y. Gao, X. H. Liu, Y. Yu, H. W. Gao, and X. H. Yao. 2019. 'New particle formation in the marine atmosphere during seven cruise campaigns', *Atmospheric Chemistry and Physics*, 19: 89-113.
- Zu, H. T., S. B. Zhang, L. Liu, and X. H. Zhang. 2024. 'The vital role of sulfuric acid in iodine oxoacids nucleation: impacts of urban pollutants on marine atmosphere', *Environmental Research Letters*, 19.
